# Supplementary material
Source: publisher site journal article supplement (https://www.dovepress.com/article/374416)
Supplement: Supplementary file 1 [file get_supplementary_file.php]

**Supplementary table 1 – Cognitive domains and its respective psychometric tests**

**Cognitive Domain**

**Specific Tests**

**Sensation and Perception**

Visual, Auditory, Tactile,

Gustatory, and Olfactory tests

**Motor Skills and Construction**

Motor Skills

Finger tapping, Pegboard tasks

(Simple and Grooved) and

assessments of grip strength

Construction

Rey Complex Figure, MMSE

and MOCA

**Attention and Concentration**

Selective Attention

Global-local stimulus, dual-task

processing and the Useful Field

of View (UFOV)

Sustained Attention (Vigilance)

continuous performance task

(CPT)

**Memory**

Working Memory

Digit Span Backwards

Episodic/Declarative Memory

Hopkins Verbal Learning Test

(HVLT), California Verbal

Learning test (CVLT), The Rey

Auditory verbal Learning test

(RAVLT),

Procedural Memory

No standardized test

Semantic Memory

No standardized test

Prospective Memory

No standardized test

**Executive Function**

Wisconsin Card Sorting Test

(WCST), Trail-Making Part B

**Processing Speed**

Various coding tasks (Symbol

Coding), Trail Making Test

**Language/Verbal Skills**

Measures of fluency (eg, name as

many animals as possible),

object naming, and responding to

instructions
